# Supplementary material for: Genomic Association vs. Serological Determination of ABO Blood Types in a Chinese Cohort, with Application in Mendelian Randomization
Source: MDPI journal article supplement (doi:10.3390/genes12070959), 2021-06-24
Supplement: s1 [file s1]

## **Supplemental Materials**

- Supplemental figures (10)
- Supplemental tables (11)

## Supplementary figures

Figure S1

*Schematic diagram for the study design of GWAS on ABO blood types in a Chinese population*

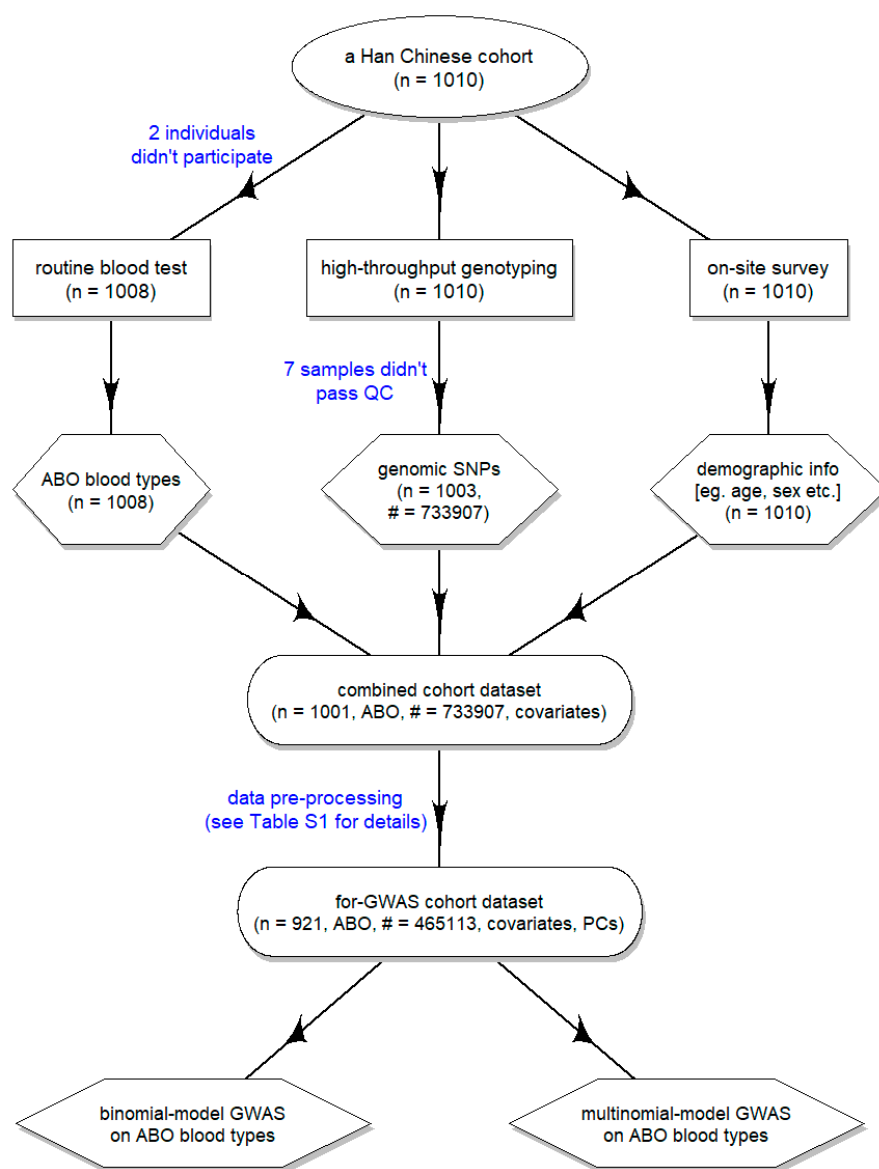

Figure S2

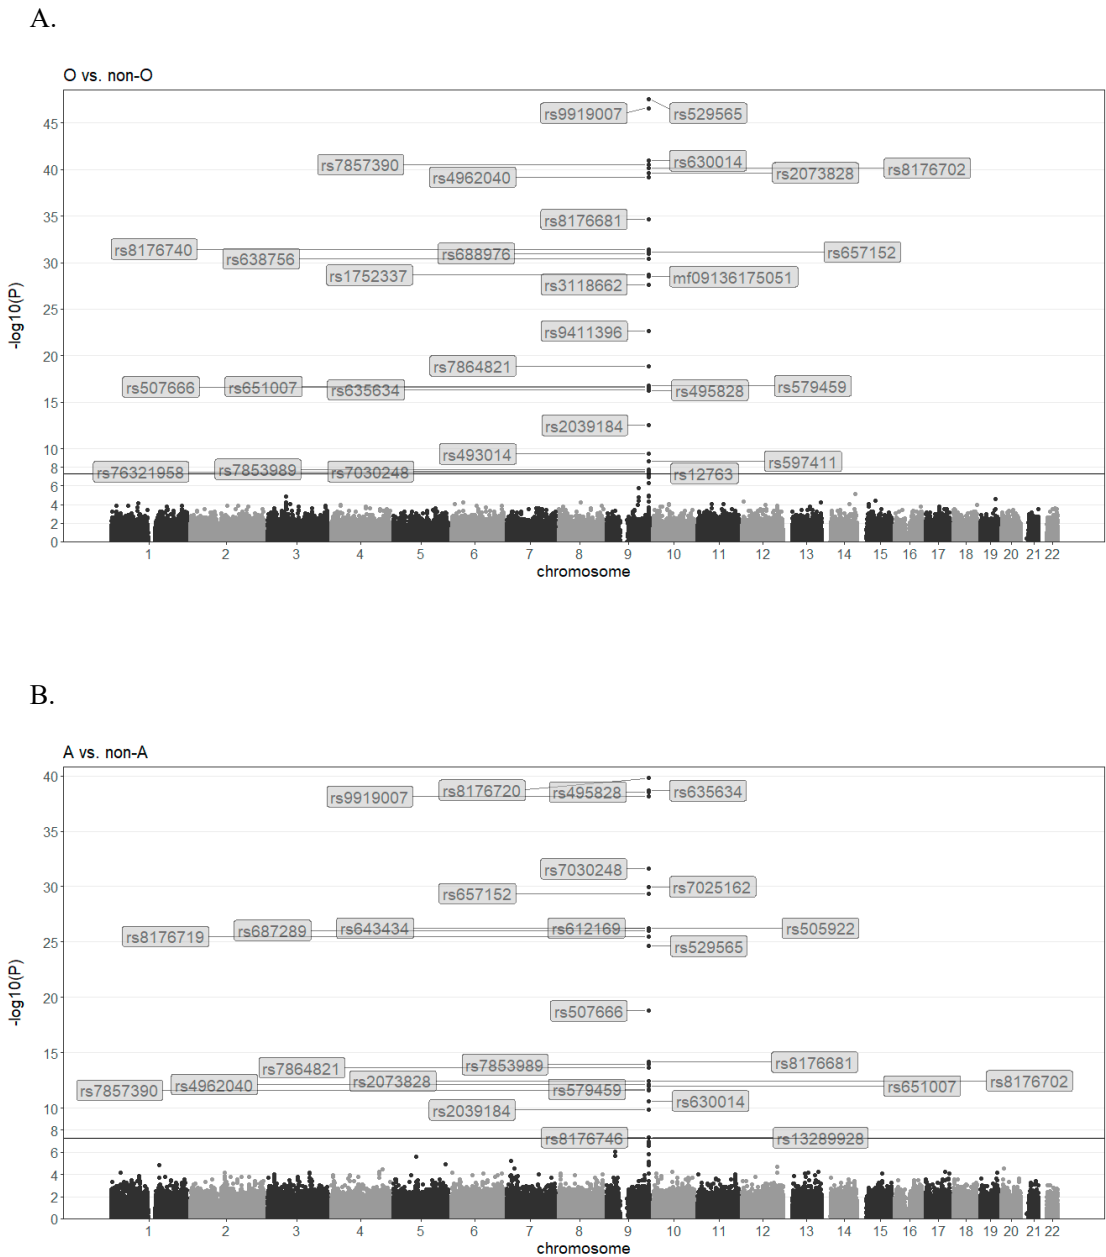

C.

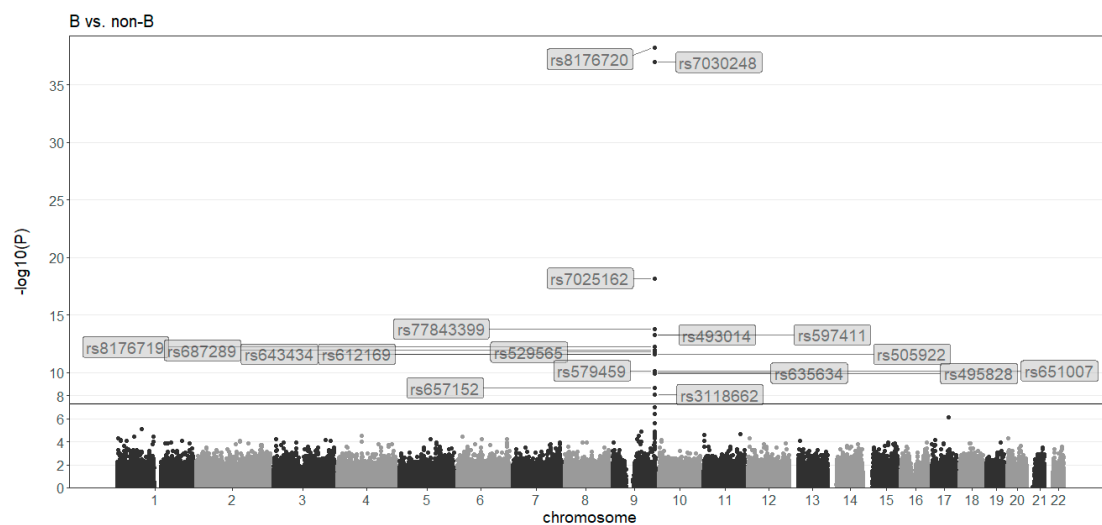

D.

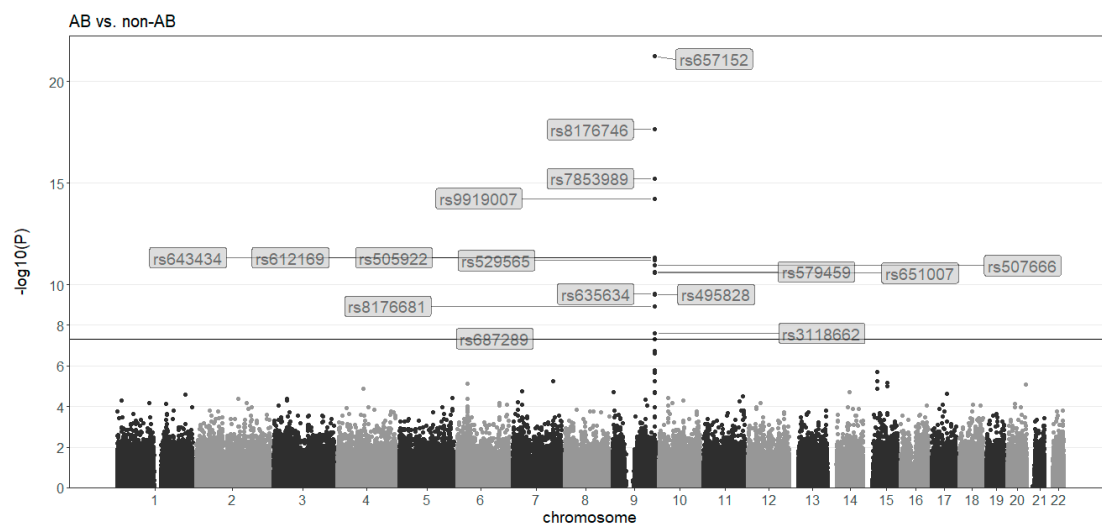

A.

B.

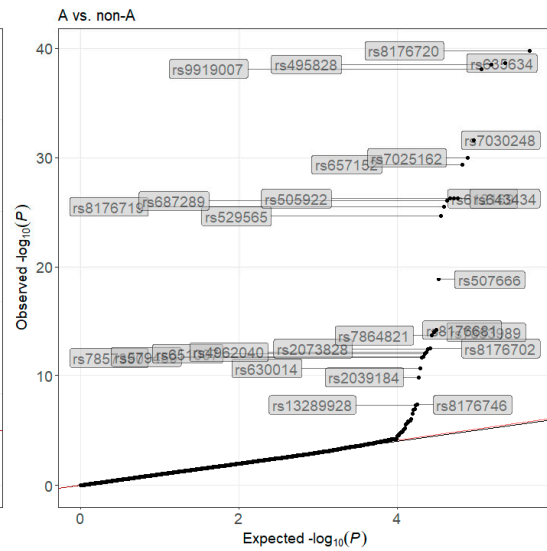

D.

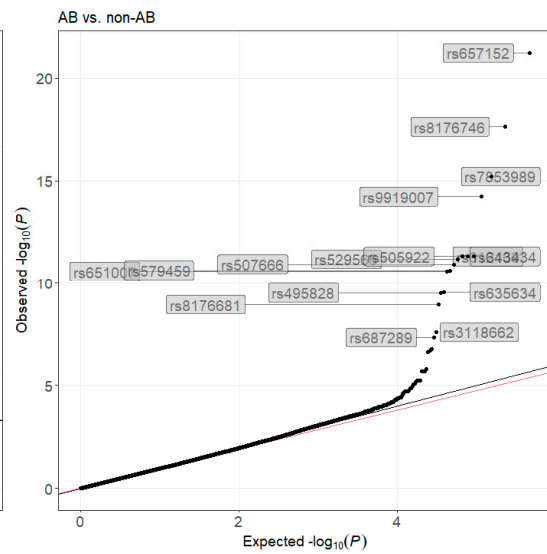

Figure S4

A.

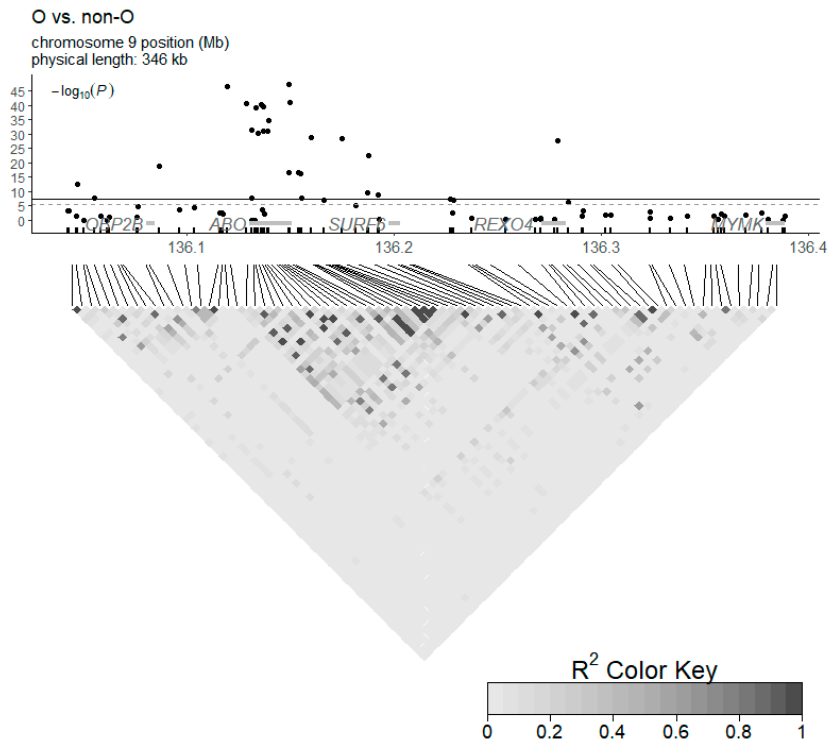

B.

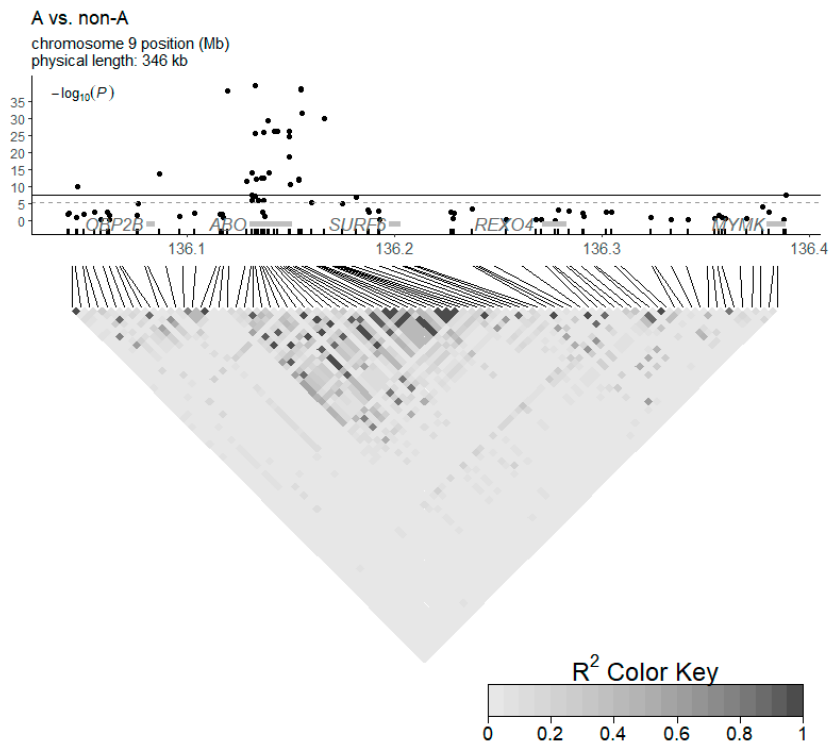

C.

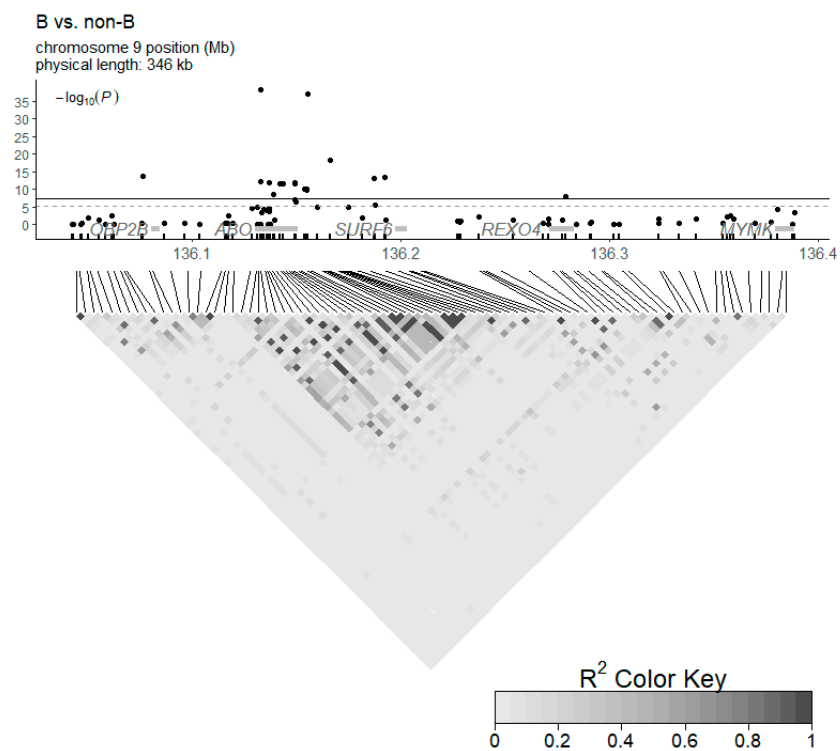

D.

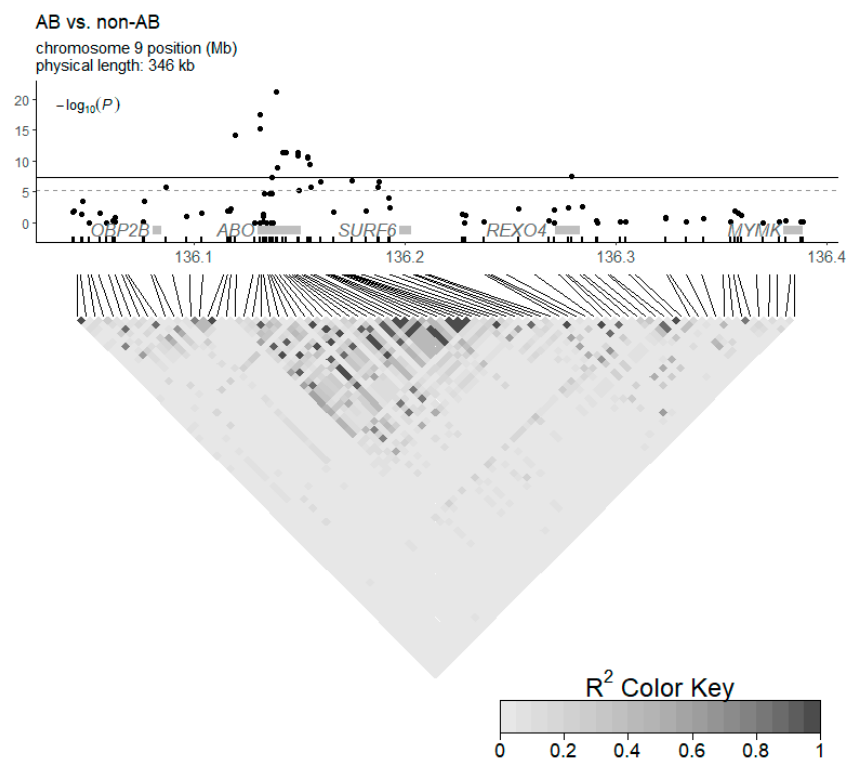

**Figure S5**

**A.**

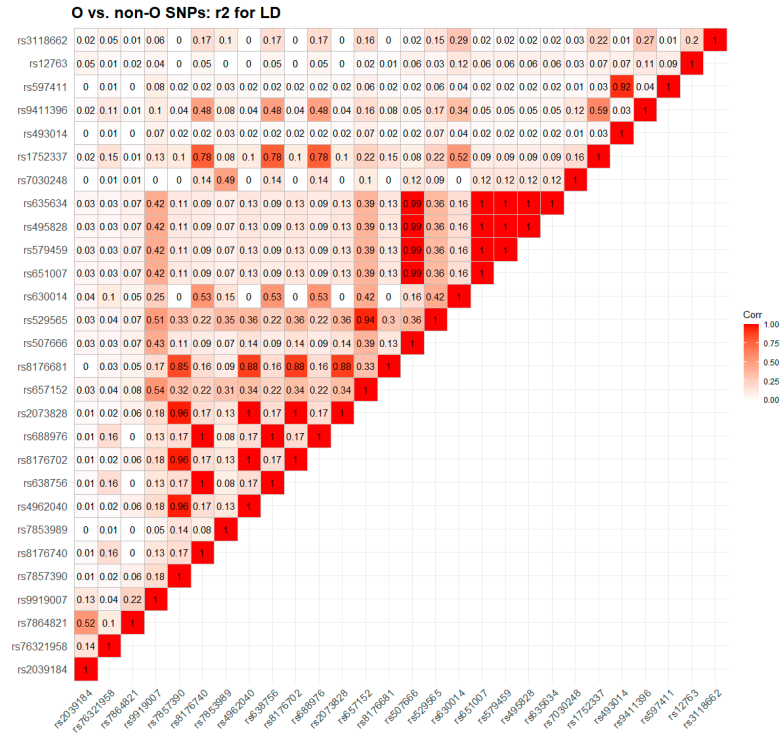

**B.**

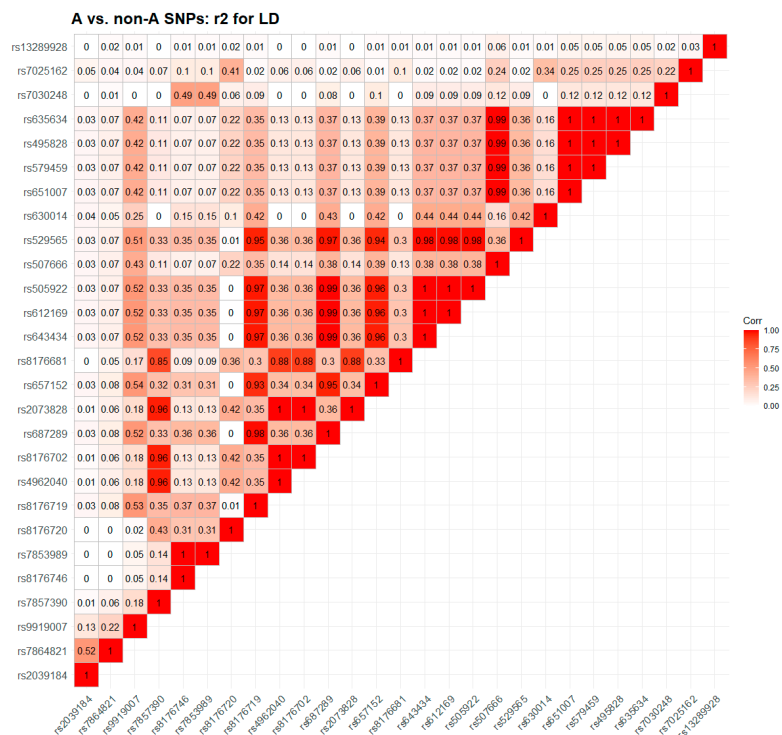



C.

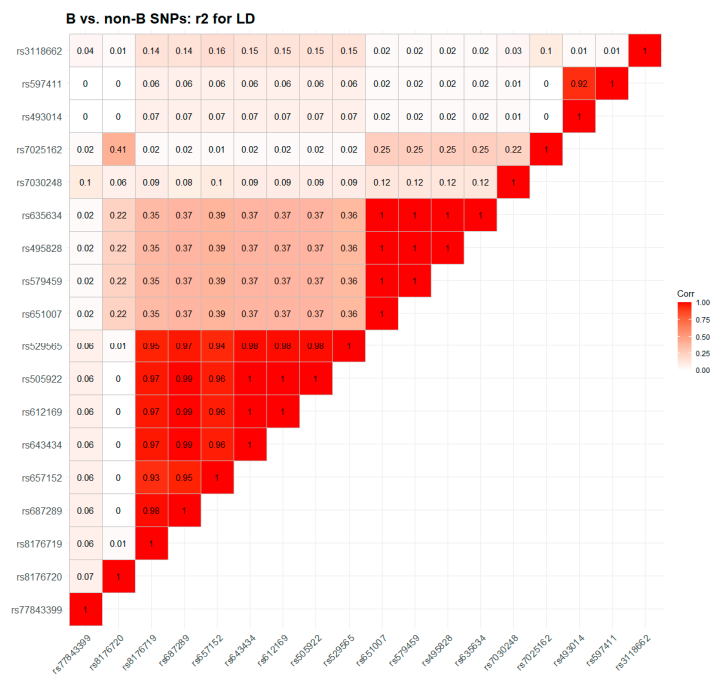

D.

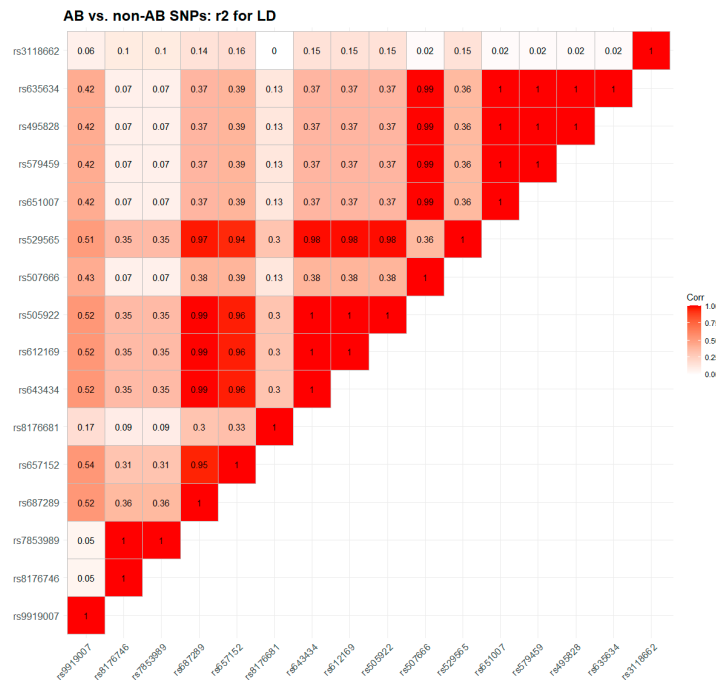

Figure S6

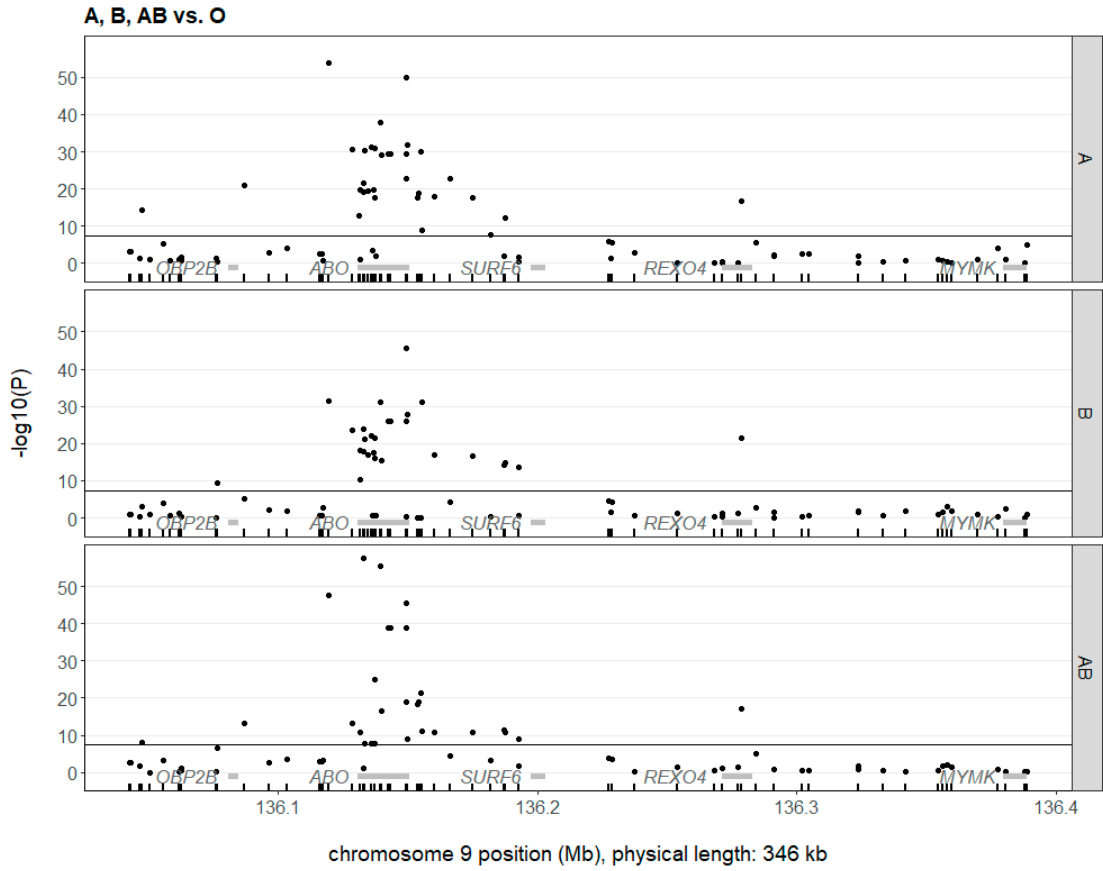

Figure S7

A.

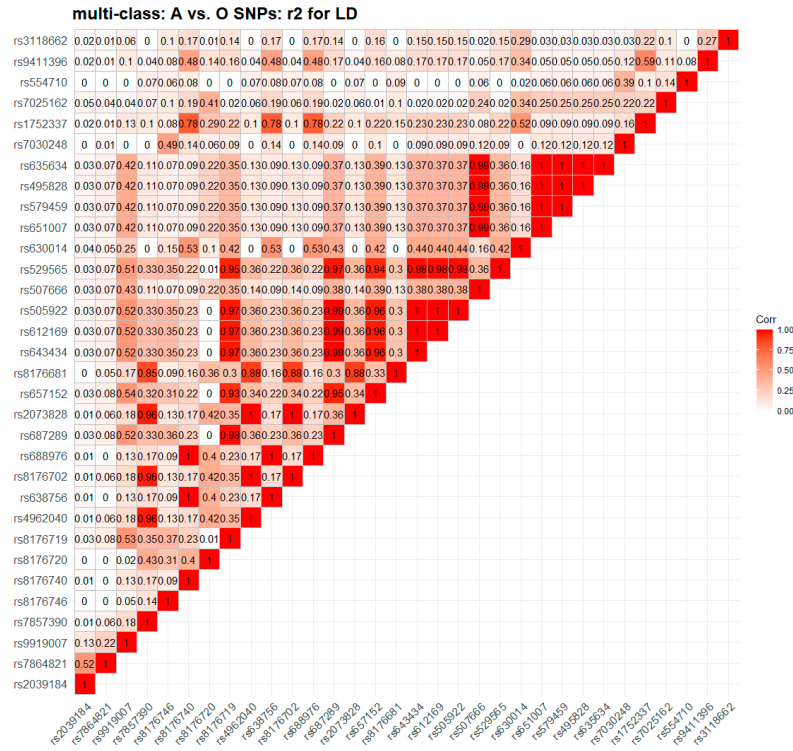

B.

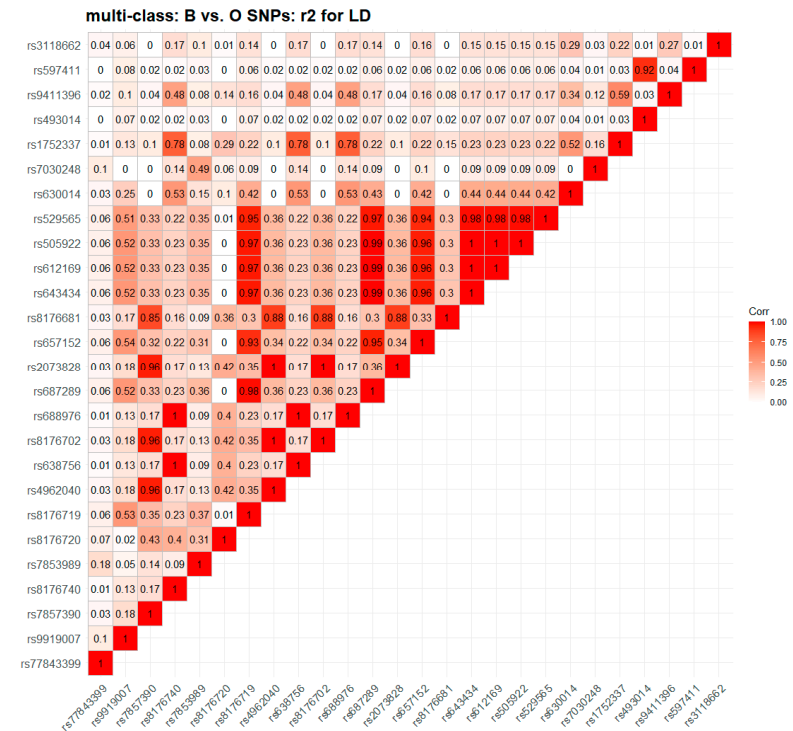

C.

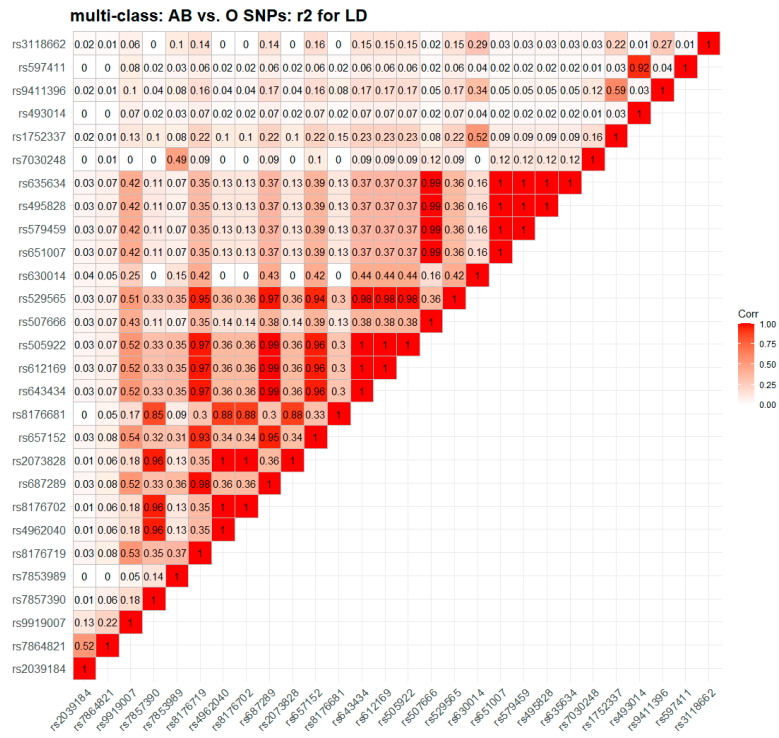

Figure S8

A.

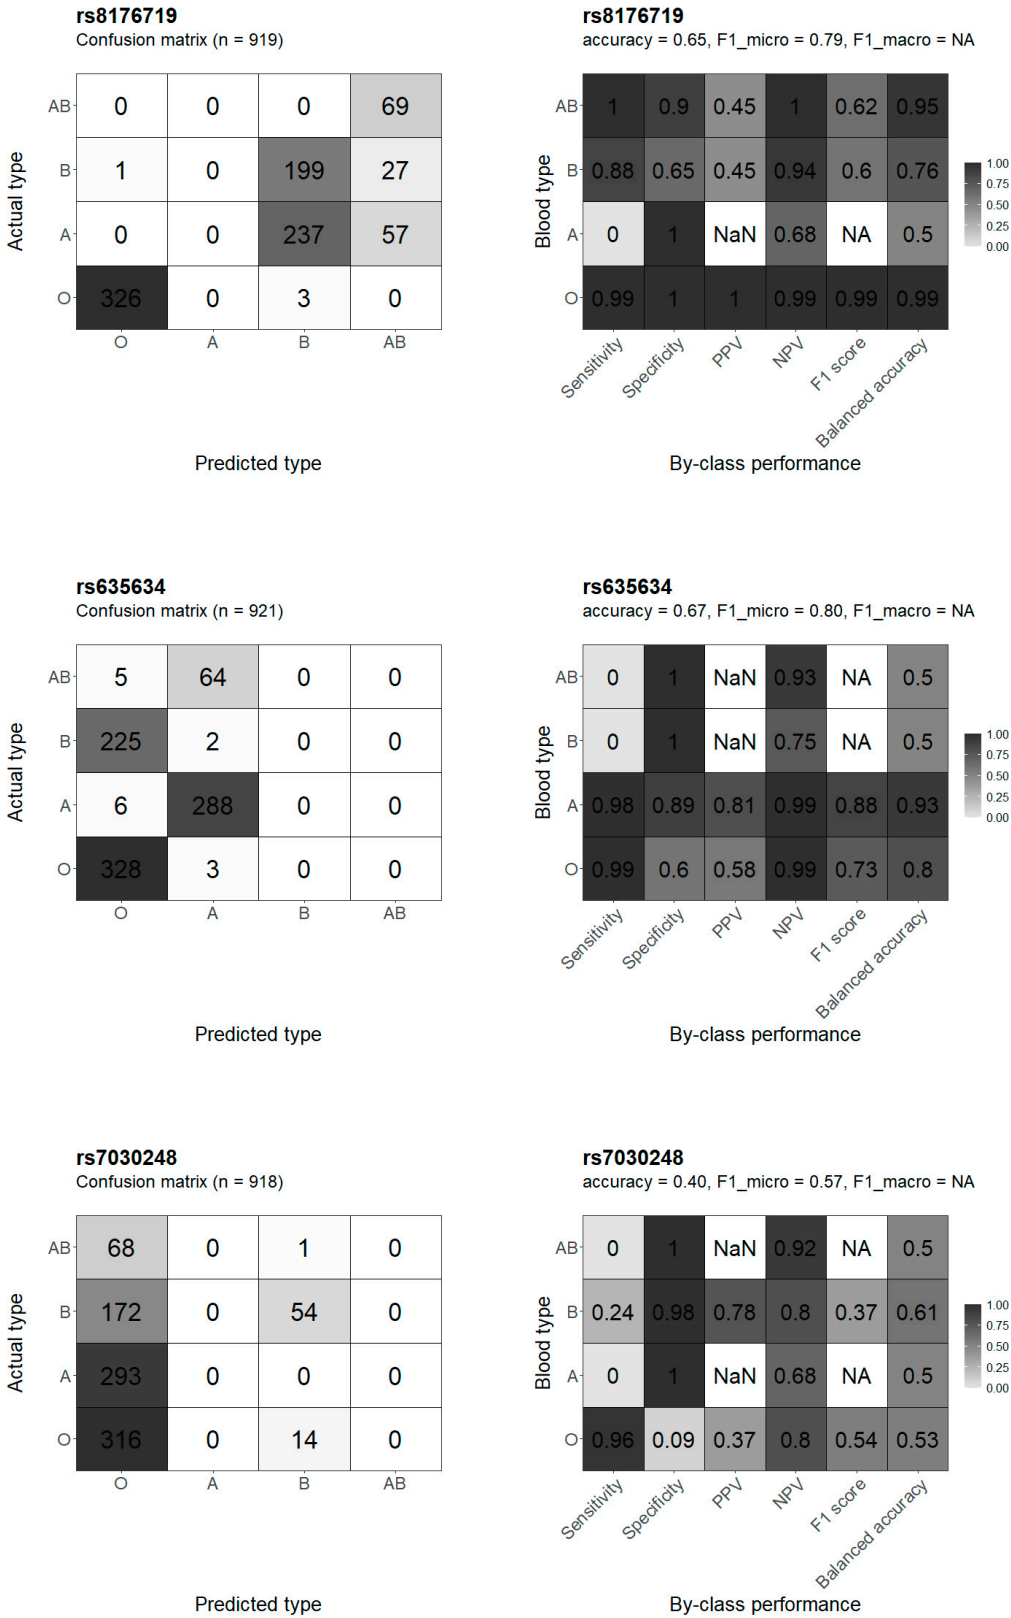

B.

**rs8176719 + rs635634**

Confusion matrix (n = 919)

| Actual type | AB  | B   | A   | O  |
|-------------|-----|-----|-----|----|
|             | 0   | 0   | 5   | 64 |
|             | 1   | 1   | 224 | 1  |
|             | 0   | 285 | 6   | 3  |
|             | 326 | 0   | 3   | 0  |
|             | O   | A   | B   | AB |

Predicted type

**rs8176719 + rs635634**

accuracy = 0.98, F1\_micro = 0.99, F1\_macro = 0.97

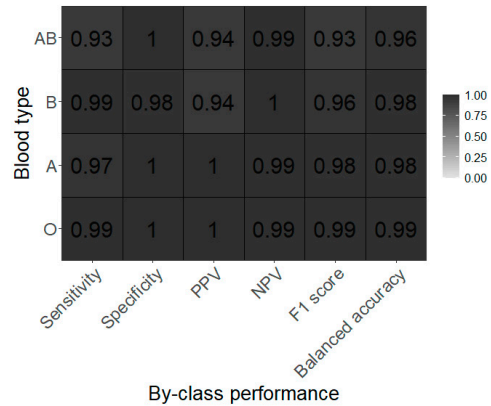

By-class performance

**rs8176719 + rs7030248**

Confusion matrix (n = 916)

| Actual type | AB  | B   | A   | O  |
|-------------|-----|-----|-----|----|
|             | 0   | 7   | 1   | 61 |
|             | 1   | 11  | 209 | 5  |
|             | 0   | 245 | 47  | 1  |
|             | 325 | 0   | 3   | 0  |
|             | O   | A   | B   | AB |

Predicted type

**rs8176719 + rs7030248**

accuracy = 0.92, F1\_micro = 0.96, F1\_macro = 0.91

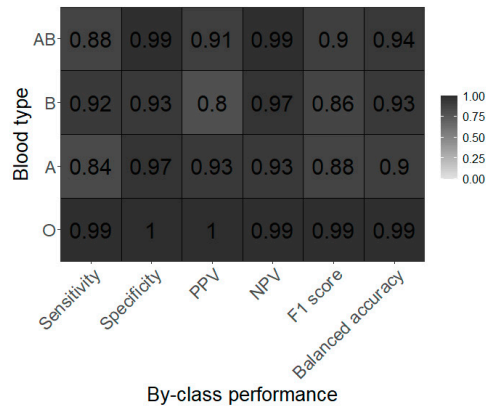

By-class performance

**rs635634 + rs7030248**

Confusion matrix (n = 918)

| Actual type | AB  | B   | A  | O  |
|-------------|-----|-----|----|----|
|             | 4   | 6   | 1  | 58 |
|             | 170 | 1   | 54 | 1  |
|             | 6   | 241 | 0  | 46 |
|             | 313 | 3   | 14 | 0  |
|             | O   | A   | B  | AB |

Predicted type

**rs635634 + rs7030248**

accuracy = 0.73, F1\_micro = 0.84, F1\_macro = 0.72

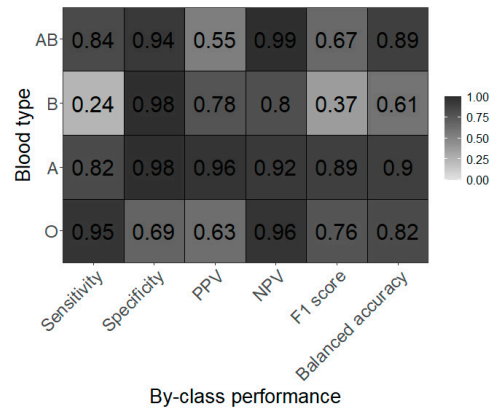

By-class performance

C.

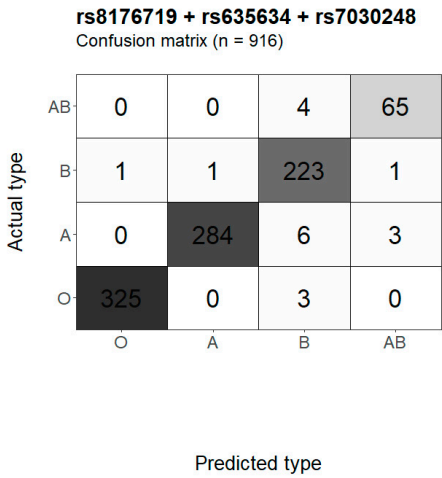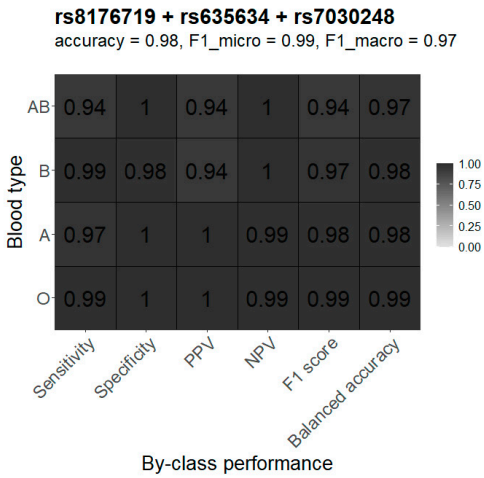

**Figure S9**

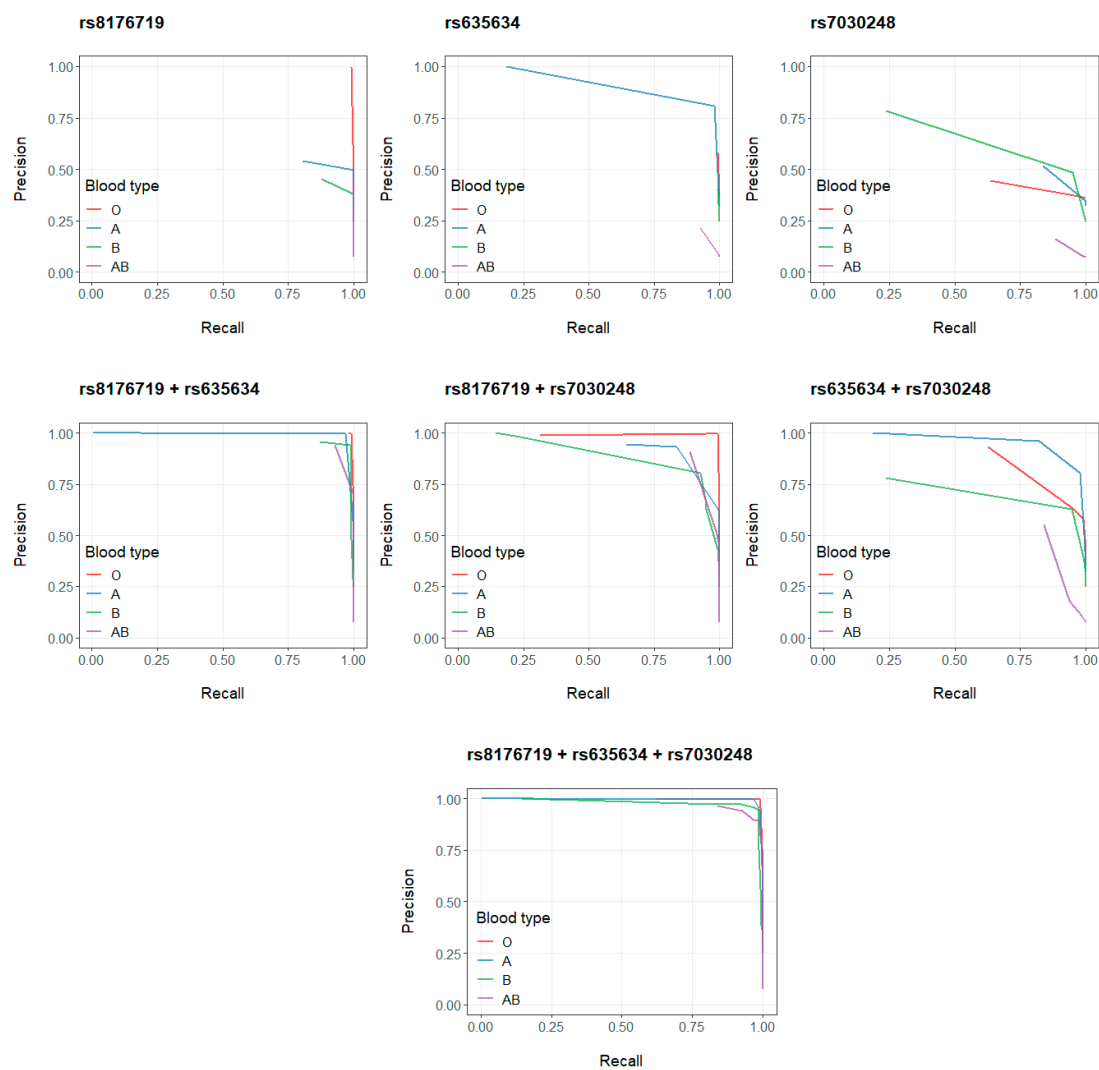



**Figure S10**

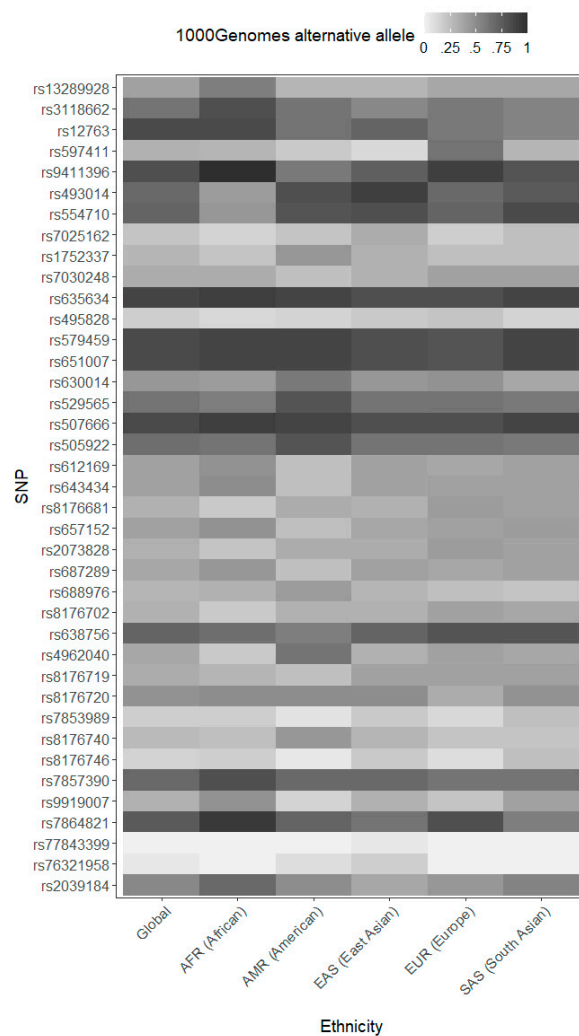

## Supplementary figure legends

Figure S1. Schematic diagram for the study design of GWAS on ABO blood types in a Chinese population. QC: quality control; PCs: principal components.

Figure S2. Manhattan plots for the binary (2-level) outcomes: O vs. non-O (A), A vs. non-A (B), B vs. non-B (C) and AB vs. non-AB (D) in the cohort. Genome-wide hit SNPs (above the horizontal line) are annotated.

Figure S3. Quantile-quantile plots for the binary (2-level) outcomes: O vs. non-O (A), A vs. non-A (B), B vs. non-B (C) and AB vs. non-AB (D) in the cohort. Genome-wide hit SNPs are annotated. A line of  $y = x$  (black) and a line of  $y = \lambda_{median}x$  (red, the inflation factor  $\lambda_{median}$  are 1.008, 1.023, 1.013 and 0.952 respectively) are displayed.

Figure S4. Regional association plots for the binary (2-level) outcomes: O vs. non-O (A), A vs. non-A (B), B vs. non-B (C) and AB vs. non-AB (D) in the cohort. Genes are annotated as grey rectangles.

Figure S5. Linkage analysis ( $r^2$ ) between ABO-associated hit SNPs for the binary (2-level) outcomes: O vs. non-O (A), A vs. non-A (B), B vs. non-B (C) and AB vs. non-AB (D) in the Chinese (CHB + CHS) from the 1000 Genomes (<https://www.internationalgenome.org/>).

Figure S6. Regional association plots for the quaternary (4-level, reference level of type O) outcomes of A vs. O (upper), B vs. O (middle) and AB vs. O (lower) in the cohort. Genes are annotated as grey rectangles.

Figure S7. Linkage analysis ( $r^2$ ) between ABO-associated hit SNPs for the quaternary (4-level, reference level of type O) outcomes: A vs. O (A), B vs. O (B) and AB vs. O (C) in the Chinese (CHB + CHS) from the 1000 Genomes (<https://www.internationalgenome.org/>).

Figure S8. Confusion matrix (left) and classification performance parameters (right) for the prediction of ABO blood types based on *rs8176719*, *rs635634*, *rs7030248* (A), and their combinations (B and C). Accuracy,  $F1_{micro}$ , and  $F1_{macro}$  evaluate the overall multi-class performances; the color shaded tiles evaluate the by-blood-type binary performances.  $F1_{micro}$  and  $F1_{macro}$  are the F1

scores designed for multi-class classification obtained by micro-averaging (weighted by class frequency) or macro-averaging (weighting all classes equally).

Figure S9. By-blood-type precision-recall plots for *rs8176719*, *rs635634*, *rs7030248*, and their combinations. Note: for precision-recall plots, scenario in which all individuals are predicted for the “negative” class results in 0/0 for precision and 0 for recall, thus unable to plot such data points (leading to the incomplete portion of plot); consequently, AUC (area under the curve) is not calculated for the precision-recall plots.

Figure S10. Allele frequency of common hit SNPs in the multinomial models from this study among the globe and five super-ancestries from the 1000 Genomes (<https://www.internationalgenome.org/>).

## Supplementary tables

**Table S1. Summary of the general and by-type baseline characteristics**

|                           | <b>All</b> | <b>O</b>   | <b>A</b>   | <b>B</b>   | <b>AB</b> |
|---------------------------|------------|------------|------------|------------|-----------|
| <i>n</i>                  | 1008       | 356        | 322        | 253        | 77        |
| %                         | 100        | 35.3       | 31.9       | 25.1       | 7.7       |
| sex <sub>female</sub> (%) | 569(56.4)  | 194(54.5)  | 187(58.1)  | 142(56.1)  | 46(59.7)  |
| age (years)               |            |            |            |            |           |
| - median                  | 46         | 46         | 47         | 47         | 44        |
| - IQR                     | 39-52      | 39-52      | 39-53      | 39-52      | 36-52     |
| - range                   | 30-79      | 30-72      | 30-78      | 30-79      | 30-77     |
| height (cm)               |            |            |            |            |           |
| - median                  | 158        | 159        | 158        | 158        | 158       |
| - IQR                     | 153-164    | 154-164    | 153-164    | 154-164    | 152-166   |
| - range                   | 124-182    | 140-180    | 124-178    | 138-182    | 146-178   |
| weight (kg)               |            |            |            |            |           |
| - median                  | 59.8       | 60.0       | 59.8       | 59.2       | 58.6      |
| - IQR                     | 53.1-67.6  | 53.8-67.0  | 54.4-67.5  | 52.3-67.9  | 51.8-67.6 |
| - range                   | 35.5-111.2 | 37.2-111.2 | 39.5-101.4 | 35.5-106.1 | 43.7-90.0 |

Note: IQR - inter-quartile range.

**Table S2. Distribution of ABO blood types across Asian ethnicities**

| Ethnicity                  | O (%) | A (%) | B (%) | AB (%) |
|----------------------------|-------|-------|-------|--------|
| Chinese (this study)       | 36    | 32    | 25    | 7      |
| Chinese (Canton)           | 46    | 23    | 25    | 6      |
| Chinese (Peking)           | 29    | 27    | 32    | 13     |
| Japanese                   | 30    | 38    | 22    | 10     |
| Korean                     | 28    | 32    | 31    | 10     |
| Thai                       | 37    | 22    | 33    | 8      |
| Asian (in U.S.A - general) | 40    | 28    | 27    | 5      |

Note: frequency of ABO blood types in ethnicities other than this study were retrieved from Wikipedia ([https://en.wikipedia.org/wiki/Blood\\_type\\_distribution\\_by\\_country#cite\\_note-47](https://en.wikipedia.org/wiki/Blood_type_distribution_by_country#cite_note-47), last accessed on November 2, 2020), which was referenced to “Racial and ethnic distribution of ABO blood types” curated by Bloodbook.com (<http://www.bloodbook.com/world-abo.html>, last accessed on November 2, 2020).

**Table S10. Frequency summary of individuals with the defined set of SNPs ( $n = 916$ )**

| count | percentage (%) | rs8176719 | rs635634 | rs7030248 |
|-------|----------------|-----------|----------|-----------|
| 205   | 22.4           | 0         | 0        | 0         |
| 104   | 11.4           | 0         | 0        | 1         |
| 14    | 1.5            | 0         | 0        | 2         |
| 3     | 0.3            | 0         | 1        | 0         |
| 14    | 1.5            | 1         | 0        | 0         |
| 160   | 17.5           | 1         | 0        | 1         |
| 33    | 3.6            | 1         | 0        | 2         |
| 185   | 20.2           | 1         | 1        | 0         |
| 45    | 4.9            | 1         | 1        | 1         |
| 1     | 0.1            | 1         | 2        | 0         |
| 1     | 0.1            | 2         | 0        | 0         |
| 7     | 0.8            | 2         | 0        | 1         |
| 22    | 2.4            | 2         | 0        | 2         |
| 8     | 0.9            | 2         | 1        | 0         |
| 60    | 6.6            | 2         | 1        | 1         |
| 54    | 5.9            | 2         | 2        | 0         |

Note: 916 out of the 921 individuals subjected to GWAS analysis have all these three SNPs successfully genotyped.

**Table S11. Summary of individuals with wrongly predicted ABO blood types ( $n = 19$ )**

| count | rs8176719 | rs635634 | rs7030248 | blood-typed | predicted |
|-------|-----------|----------|-----------|-------------|-----------|
| 4     | 1         | 0        | 0         | A           | B         |
| 3     | 2         | 0        | 1         | AB          | B         |
| 3     | 1         | 0        | 1         | O           | B         |
| 2     | 1         | 0        | 1         | A           | B         |
| 2     | 2         | 1        | 0         | A           | AB        |
| 1     | 0         | 0        | 1         | B           | O         |
| 1     | 2         | 1        | 1         | B           | AB        |
| 1     | 1         | 1        | 0         | B           | A         |
| 1     | 2         | 0        | 2         | AB          | B         |
| 1     | 2         | 1        | 1         | A           | AB        |

**Table S3. Summary of GWAS on the binary trait of O vs. non-O blood types**

| SNP                           | Chr.(position) | genomic region   | ra(%)   | ma(%)   | allele zygosity (%)        | -log <sub>10</sub> (P) | OR     |
|-------------------------------|----------------|------------------|---------|---------|----------------------------|------------------------|--------|
| <b><i>O vs. non-O</i></b>     |                |                  |         |         |                            |                        |        |
| <i>rs529565</i> <sup>#</sup>  | 9(136149500)   | ABO(intron)      | C(59.4) | T(40.6) | CC(35.2),CT(48.4),TT(16.4) | 47.5                   | 0.0004 |
| <i>rs9919007</i> <sup>#</sup> | 9(136119527)   | OBP2B*ABO        | T(68.0) | C(32.0) | TT(46.8),TC(42.5),CC(10.7) | 46.6                   | 0.01   |
| <i>rs630014</i>               | 9(136149722)   | ABO(intron)      | A(62.2) | G(37.8) | AA(37.9),AG(48.6),GG(13.5) | 40.9                   | 10.4   |
| <i>rs7857390</i>              | 9(136128546)   | ABO(3'-UTR)      | A(66.4) | G(33.6) | AA(43.8),AG(45.0),GG(11.1) | 40.5                   | 7.5    |
| <i>rs8176702</i>              | 9(136136146)   | ABO(intron)      | A(66.8) | G(33.2) | AA(44.7),AG(44.2),GG(11.1) | 40.2                   | 7.1    |
| <i>rs2073828</i>              | 9(136137140)   | ABO(intron)      | A(66.4) | G(33.6) | AA(44.0),AG(45.0),GG(11.1) | 39.6                   | 7.0    |
| <i>rs4962040</i> <sup>#</sup> | 9(136133531)   | ABO(intron)      | G(66.9) | A(33.1) | GG(44.3),GA(45.2),AA(10.5) | 39.2                   | 7.0    |
| <i>rs8176681</i>              | 9(136139754)   | ABO(intron)      | C(66.3) | T(33.7) | CC(43.8),CT(44.8),TT(11.4) | 34.6                   | 5.2    |
| <i>rs8176740</i> <sup>#</sup> | 9(136131472)   | ABO(exon, F216I) | T(74.3) | A(25.7) | TT(54.6),TA(39.5),AA(5.9)  | 31.4                   | 4.9    |
| <i>rs657152</i>               | 9(136139265)   | ABO(intron)      | A(61.0) | C(39.0) | AA(37.1),AC(47.8),CC(15.1) | 31.1                   | 0.0003 |
| <i>rs688976</i> <sup>#</sup>  | 9(136136770)   | ABO(exon, V36F)  | A(74.0) | C(25.9) | AA(54.3),AC(39.5),CC(6.2)  | 31.0                   | 4.8    |
| <i>rs638756</i>               | 9(136134472)   | ABO(intron)      | C(73.6) | A(26.4) | CC(53.5),CA(40.2),AA(6.3)  | 30.4                   | 4.7    |
| <i>rs1752337</i> <sup>#</sup> | 9(136160228)   | ABO*SURF6        | G(72.3) | T(27.7) | GG(52.2),GT(40.2),TT(7.6)  | 28.7                   | 4.2    |
| <i>mf09136175051</i>          | 9(136175051)   | ABO*SURF6        | T(72.4) | C(27.6) | TT(52.2),TC(40.4),CC(7.4)  | 28.5                   | 4.2    |
| <i>rs3118662</i> <sup>#</sup> | 9(136278870)   | REXO4(intron)    | G(51.6) | A(48.4) | GG(26.3),GA(50.7),AA(23)   | 27.6                   | 3.8    |
| <i>rs9411396</i> <sup>#</sup> | 9(136187652)   | ABO*SURF6        | G(73.7) | T(26.3) | GG(53.8),GT(39.8),TT(6.4)  | 22.6                   | 3.4    |
| <i>rs7864821</i> <sup>#</sup> | 9(136086916)   | OBP2B(intron)    | C(60.6) | T(39.4) | CC(36.8),CT(47.7),TT(15.5) | 18.9                   | 0.4    |
| <i>rs579459</i>               | 9(136154168)   | ABO*SURF6        | C(77.6) | T(22.4) | CC(60.8),CT(33.7),TT(5.5)  | 16.8                   | 0.007  |
| <i>rs651007</i> <sup>#</sup>  | 9(136153875)   | ABO*SURF6        | T(77.4) | C(22.6) | TT(60.7),TC(33.5),CC(5.8)  | 16.7                   | 0.007  |
| <i>rs507666</i>               | 9(136149399)   | ABO(intron)      | A(77.8) | G(22.2) | AA(61.0),AG(33.6),GG(5.4)  | 16.6                   | 0.007  |



|                               |              |                   |         |         |                            |      |       |
|-------------------------------|--------------|-------------------|---------|---------|----------------------------|------|-------|
| <i>rs495828</i>               | 9(136154867) | ABO*SURF6         | T(77.9) | G(22.1) | TT(61.5),TG(32.8),GG(5.7)  | 16.3 | 0.007 |
| <i>rs635634</i>               | 9(136155000) | ABO*SURF6         | T(77.9) | C(22.1) | TT(61.4),TC(32.9),CC(5.7)  | 16.3 | 0.007 |
| <i>rs2039184<sup>#</sup></i>  | 9(136047393) | RALGDS*OBP2B      | G(59.2) | A(40.8) | GG(35.3),GA(48.0),AA(16.7) | 12.5 | 0.4   |
| <i>rs493014<sup>#</sup></i>   | 9(136187163) | ABO*SURF6         | G(90.7) | T(9.3)  | GG(81.9),GT(17.5),TT(0.6)  | 9.4  | 0.2   |
| <i>rs597411</i>               | 9(136192624) | ABO*SURF6         | T(90.5) | G(9.5)  | TT(81.7),TG(17.7),GG(0.6)  | 8.7  | 0.2   |
| <i>rs7853989<sup>#</sup></i>  | 9(136131592) | ABO(exon, R176G)  | C(82.6) | G(17.4) | CC(66.4),CG(32.4),GG(1.2)  | 7.8  | 0.003 |
| <i>rs7030248<sup>#</sup></i>  | 9(136155359) | ABO*SURF6         | A(71.9) | G(28.1) | AA(51.0),AG(41.8),GG(7.2)  | 7.6  | 0.5   |
| <i>rs76321958<sup>#</sup></i> | 9(136055528) | RALGDS*OBP2B      | C(84.6) | G(15.4) | CC(71.7),CG(25.8),GG(2.5)  | 7.5  | 2.1   |
| <i>rs12763<sup>#</sup></i>    | 9(136227260) | SURF2(exon,G213S) | A(67.7) | G(32.3) | AA(46.1),AG(43.2),GG(10.7) | 7.3  | 0.5   |

Note: 1. coordinate position on chromosomes is based on GRCh37.

2. \* in “genomic region” annotates intergenic region, e.g. OBP2B\*ABO annotates an intergenic locus downstream of OBP2B and upstream of ABO.

3. ra - reference allele (major allele); ma - minor allele; OR, odds ratio.

4. the above notes also apply to Table S4 to S9.

5. <sup>#</sup> suffix in SNP annotates the subset of hit variants selected after LD screening ( $r^2 < 0.8$ ) and to be evaluated for binary classification performances in Table 1.

For example, *rs529565* is the top ranked SNP for O vs. non-O and selected for binary classification evaluation (thus annotated with the suffix as *rs529565<sup>#</sup>*). With linkage analysis from Figure S5A, those hit variants with high linkage ( $r^2 \geq 0.8$ ) to *rs529565* would not be selected for binary classification evaluation (thus no <sup>#</sup> suffix: *rs657152* with  $r^2 = 0.94$ ). Iterating the above analysis for all hit SNPs leads to the selection of <sup>#</sup> suffix genetic variants to be evaluated in Table 1. This note also applies to Table S4 to S6.

**Table S4. Summary of GWAS on the binary trait of A vs. non-A blood types**

| SNP                           | Chr.(position) | genomic region    | ra(%)    | ma(%)   | allele zygotity (%)        | -log <sub>10</sub> (P) | OR     |
|-------------------------------|----------------|-------------------|----------|---------|----------------------------|------------------------|--------|
| <b><u>A vs. non-A</u></b>     |                |                   |          |         |                            |                        |        |
| <i>rs8176720</i> <sup>#</sup> | 9(136132873)   | ABO(exon, silent) | C(56.1)  | T(43.9) | CC(30.4),CT(51.5),TT(18.1) | 39.8                   | 0.1    |
| <i>rs635634</i> <sup>#</sup>  | 9(136155000)   | ABO*SURF6         | T(77.9)  | C(22.1) | TT(61.5),TC(32.8),CC(5.7)  | 38.7                   | 363.4  |
| <i>rs495828</i>               | 9(136154867)   | ABO*SURF6         | T(77.9)  | G(22.1) | TT(61.5),TG(32.8),GG(5.7)  | 38.5                   | 358.6  |
| <i>rs9919007</i> <sup>#</sup> | 9(136119527)   | OBP2B*ABO         | T(68.0)  | C(32.0) | TT(46.8),TC(42.6),CC(10.7) | 38.1                   | 6.4    |
| <i>rs7030248</i> <sup>#</sup> | 9(136155359)   | ABO*SURF6         | A(71.9)  | G(28.1) | AA(51.0),AG(41.8),GG(7.2)  | 31.6                   | 0.1    |
| <i>rs7025162</i> <sup>#</sup> | 9(136166346)   | ABO*SURF6         | T(60.2)  | C(39.8) | TT(35.4),TC(49.8),CC(14.8) | 30.0                   | 4.6    |
| <i>rs657152</i>               | 9(136139265)   | ABO(intron)       | A(61.0)  | C(39.0) | AA(37.1),AC(47.8),CC(15.1) | 29.4                   | 4.2    |
| <i>rs505922</i>               | 9(136149229)   | ABO(intron)       | C(59.3)  | T(40.7) | CC(35),CT(48.7),TT(16.4)   | 26.2                   | 3.6    |
| <i>rs612169</i>               | 9(136143442)   | ABO(intron)       | G(59.2)  | A(40.8) | GG(34.9),GA(48.8),AA(16.4) | 26.2                   | 3.6    |
| <i>rs643434</i>               | 9(136142355)   | ABO(intron)       | A(59.2)  | G(40.8) | AA(34.9),AG(48.8),GG(16.4) | 26.2                   | 3.6    |
| <i>rs687289</i>               | 9(136137106)   | ABO(intron)       | A(59.5)  | G(40.5) | AA(35.4),AG(48.2),GG(16.4) | 26.0                   | 3.6    |
| <i>rs8176719</i> <sup>#</sup> | 9(136132908)   | ABO(exon, insert) | TC(59.4) | T(40.6) | II(35.0),ID(48.6),DD(16.4) | 25.5                   | 3.6    |
| <i>rs529565</i>               | 9(136149500)   | ABO(intron)       | C(59.4)  | T(40.6) | CC(35.2),CT(48.4),TT(16.4) | 24.6                   | 3.4    |
| <i>rs507666</i>               | 9(136149399)   | ABO(intron)       | A(77.8)  | G(22.2) | AA(61),AG(33.6),GG(5.4)    | 18.8                   | 1302.9 |
| <i>rs8176681</i>              | 9(136139754)   | ABO(intron)       | C(66.3)  | T(33.7) | CC(43.8),CT(44.8),TT(11.4) | 14.1                   | 0.4    |
| <i>rs7853989</i> <sup>#</sup> | 9(136131592)   | ABO(exon, R176G)  | C(82.6)  | G(17.4) | CC(66.4),CG(32.4),GG(1.2)  | 13.9                   | 0.02   |
| <i>rs7864821</i> <sup>#</sup> | 9(136086916)   | OBP2B(intron)     | C(60.6)  | T(39.4) | CC(36.8),CT(47.7),TT(15.5) | 13.6                   | 2.3    |
| <i>rs8176702</i>              | 9(136136146)   | ABO(intron)       | A(66.8)  | G(33.2) | AA(44.7),AG(44.2),GG(11.1) | 12.5                   | 0.4    |
| <i>rs2073828</i>              | 9(136137140)   | ABO(intron)       | A(66.4)  | G(33.6) | AA(44.0),AG(45.0),GG(11.0) | 12.4                   | 0.4    |
| <i>rs4962040</i>              | 9(136133531)   | ABO(intron)       | G(66.9)  | A(33.1) | GG(44.3),GA(45.2),AA(10.5) | 12.1                   | 0.4    |
| <i>rs651007</i>               | 9(136153875)   | ABO*SURF6         | T(77.4)  | C(22.6) | TT(60.7),TC(33.5),CC(5.8)  | 12.0                   | 2330.0 |

|                                |              |                  |         |         |                            |      |        |
|--------------------------------|--------------|------------------|---------|---------|----------------------------|------|--------|
| <i>rs579459</i>                | 9(136154168) | ABO*SURF6        | C(77.6) | T(22.4) | CC(60.8),CT(33.7),TT(5.5)  | 11.7 | 2471.6 |
| <i>rs7857390</i> <sup>#</sup>  | 9(136128546) | ABO(3'-UTR)      | A(66.4) | G(33.6) | AA(43.8),AG(45.1),GG(11.1) | 11.6 | 0.4    |
| <i>rs630014</i> <sup>#</sup>   | 9(136149722) | ABO(intron)      | A(62.2) | G(37.8) | AA(37.9),AG(48.6),GG(13.5) | 10.7 | 0.4    |
| <i>rs2039184</i> <sup>#</sup>  | 9(136047393) | RALGDS*OBP2B     | G(59.2) | A(40.8) | GG(35.3),GA(48.0),AA(16.8) | 9.8  | 2.0    |
| <i>rs13289928</i> <sup>#</sup> | 9(136388702) | MYMK(intron)     | G(72.0) | A(28.0) | GG(52.2),GA(39.6),AA(8.2)  | 7.3  | 1.8    |
| <i>rs8176746</i>               | 9(136131322) | ABO(exon, L266M) | T(82.4) | G(17.6) | TT(67.3),TG(30.3),GG(2.4)  | 7.3  | 0.004  |

---

**Table S5. Summary of GWAS on the binary trait of B vs. non-B blood types**

| SNP                            | Chr.(position) | genomic region    | ra(%)    | ma(%)   | allele zygosity (%)        | -log <sub>10</sub> (P) | OR    |
|--------------------------------|----------------|-------------------|----------|---------|----------------------------|------------------------|-------|
| <b><i>B vs. non-B</i></b>      |                |                   |          |         |                            |                        |       |
| <i>rs8176720</i> <sup>#</sup>  | 9(136132873)   | ABO(exon, silent) | C(56.1)  | T(43.9) | CC(30.4),CT(51.5),TT(18.1) | 38.3                   | 8.5   |
| <i>rs7030248</i> <sup>#</sup>  | 9(136155359)   | ABO*SURF6         | A(71.9)  | G(28.1) | AA(51.0),AG(41.8),GG(7.2)  | 37.0                   | 16.1  |
| <i>rs7025162</i> <sup>#</sup>  | 9(136166346)   | ABO*SURF6         | T(60.2)  | C(39.8) | TT(35.4),TC(49.8),CC(14.8) | 18.2                   | 0.3   |
| <i>rs77843399</i> <sup>#</sup> | 9(136076392)   | RALGDS*OBP2B      | T(95.8)  | C(4.2)  | TT(91.7),TC(8.2),CC(0.1)   | 13.8                   | 7.3   |
| <i>rs493014</i> <sup>#</sup>   | 9(136187163)   | ABO*SURF6         | G(90.7)  | T(9.3)  | GG(81.9),GT(17.5),TT(0.6)  | 13.3                   | 3.8   |
| <i>rs597411</i>                | 9(136192624)   | ABO*SURF6         | T(90.5)  | G(9.5)  | TT(81.7),TG(17.7),GG(0.6)  | 13.3                   | 3.8   |
| <i>rs8176719</i> <sup>#</sup>  | 9(136132908)   | ABO(exon, insert) | TC(59.4) | T(40.6) | II(35.1),ID(48.6),DD(16.3) | 12.2                   | 2.3   |
| <i>rs687289</i>                | 9(136137106)   | ABO(intron)       | A(59.5)  | G(40.5) | AA(35.4),AG(48.2),GG(16.4) | 11.9                   | 2.3   |
| <i>rs529565</i>                | 9(136149500)   | ABO(intron)       | C(59.4)  | T(40.6) | CC(35.2),CT(48.4),TT(16.4) | 11.8                   | 2.3   |
| <i>rs505922</i>                | 9(136149229)   | ABO(intron)       | C(59.3)  | T(40.7) | CC(35.0),CT(48.6),TT(16.4) | 11.6                   | 2.2   |
| <i>rs612169</i>                | 9(136143442)   | ABO(intron)       | G(59.2)  | A(40.8) | GG(34.8),GA(48.8),AA(16.4) | 11.6                   | 2.2   |
| <i>rs643434</i>                | 9(136142355)   | ABO(intron)       | A(59.2)  | G(40.8) | AA(34.8),AG(48.8),GG(16.4) | 11.6                   | 2.2   |
| <i>rs579459</i>                | 9(136154168)   | ABO*SURF6         | C(77.6)  | T(22.4) | CC(60.8),CT(33.7),TT(5.5)  | 10.2                   | 0.009 |
| <i>rs651007</i>                | 9(136153875)   | ABO*SURF6         | T(77.4)  | C(22.6) | TT(60.7),TC(33.5),CC(5.8)  | 10.2                   | 0.009 |
| <i>rs635634</i> <sup>#</sup>   | 9(136155000)   | ABO*SURF6         | T(77.9)  | C(22.1) | TT(61.4),TC(32.9),CC(5.7)  | 10.0                   | 0.01  |
| <i>rs495828</i>                | 9(136154867)   | ABO*SURF6         | T(77.9)  | G(22.1) | TT(61.5),TG(32.8),GG(5.7)  | 9.9                    | 0.01  |
| <i>rs657152</i>                | 9(136139265)   | ABO(intron)       | A(61.0)  | C(39.0) | AA(37.1),AC(47.8),CC(15.1) | 8.7                    | 2.0   |
| <i>rs3118662</i> <sup>#</sup>  | 9(136278870)   | REXO4(intron)     | G(51.6)  | A(48.4) | GG(26.3),GA(50.7),AA(23.0) | 8.1                    | 0.5   |

**Table S6. Summary of GWAS on the binary trait of AB vs. non-AB blood types**

| SNP                           | Chr.(position) | genomic region   | ra(%)   | ma(%)   | allele zygosity (%)        | -log <sub>10</sub> (P) | OR    |
|-------------------------------|----------------|------------------|---------|---------|----------------------------|------------------------|-------|
| <b><u>AB vs. non-AB</u></b>   |                |                  |         |         |                            |                        |       |
| <i>rs657152</i>               | 9(136139265)   | ABO(intron)      | A(61.0) | C(39.0) | AA(37.1),AC(47.8),CC(15.1) | 21.2                   | 48.9  |
| <i>rs8176746</i> <sup>#</sup> | 9(136131322)   | ABO(exon, L266M) | T(82.4) | G(17.6) | TT(67.3),TG(30.3),GG(2.4)  | 17.6                   | 8.3   |
| <i>rs7853989</i>              | 9(136131592)   | ABO(exon, R176G) | C(82.6) | G(17.4) | CC(66.4),CG(32.4),GG(1.2)  | 15.2                   | 13.0  |
| <i>rs9919007</i> <sup>#</sup> | 9(136119527)   | OBP2B*ABO        | T(68.0) | C(32.0) | TT(46.8),TC(42.6),CC(10.6) | 14.2                   | 4.8   |
| <i>rs505922</i>               | 9(136149229)   | ABO(intron)      | C(59.3) | T(40.7) | CC(35.0),CT(48.7),TT(16.4) | 11.3                   | 199.9 |
| <i>rs612169</i>               | 9(136143442)   | ABO(intron)      | G(59.2) | A(40.8) | GG(34.9),GA(48.8),AA(16.4) | 11.3                   | 199.9 |
| <i>rs643434</i>               | 9(136142355)   | ABO(intron)      | A(59.2) | G(40.8) | AA(34.9),AG(48.8),GG(16.4) | 11.3                   | 199.9 |
| <i>rs529565</i>               | 9(136149500)   | ABO(intron)      | C(59.4) | T(40.6) | CC(35.2),CT(48.4),TT(16.4) | 11.2                   | 208.1 |
| <i>rs507666</i> <sup>#</sup>  | 9(136149399)   | ABO(intron)      | A(77.8) | G(22.2) | AA(61),AG(33.6),GG(5.4)    | 10.9                   | 3.7   |
| <i>rs579459</i>               | 9(136154168)   | ABO*SURF6        | C(77.6) | T(22.4) | CC(60.8),CT(33.7),TT(5.5)  | 10.6                   | 3.5   |
| <i>rs651007</i>               | 9(136153875)   | ABO*SURF6        | T(77.4) | C(22.6) | TT(60.7),TC(33.5),CC(5.8)  | 10.6                   | 3.5   |
| <i>rs495828</i>               | 9(136154867)   | ABO*SURF6        | T(77.9) | G(22.1) | TT(61.5),TG(32.8),GG(5.7)  | 9.5                    | 3.2   |
| <i>rs635634</i>               | 9(136155000)   | ABO*SURF6        | T(77.9) | C(22.1) | TT(61.4),TC(32.9),CC(5.7)  | 9.5                    | 3.2   |
| <i>rs8176681</i> <sup>#</sup> | 9(136139754)   | ABO(intron)      | C(66.3) | T(33.7) | CC(43.8),CT(44.8),TT(11.4) | 8.9                    | 0.09  |
| <i>rs3118662</i> <sup>#</sup> | 9(136278870)   | REXO4(intron)    | G(51.6) | A(48.4) | GG(26.3),GA(50.7),AA(23.0) | 7.6                    | 0.3   |
| <i>rs687289</i> <sup>#</sup>  | 9(136137106)   | ABO(intron)      | A(59.5) | G(40.5) | AA(35.4),AG(48.2),GG(16.4) | 7.3                    | 475.5 |

**Table S7. Summary of GWAS on the quaternary trait of A vs. O blood types**

| SNP                   | Chr.(position) | genomic region    | ra(%)   | ma(%)   | allele zygosity (%)        | -log <sub>10</sub> (P) | OR                  |
|-----------------------|----------------|-------------------|---------|---------|----------------------------|------------------------|---------------------|
| <b><u>A vs. O</u></b> |                |                   |         |         |                            |                        |                     |
| <i>rs9919007</i>      | 9(136119527)   | OBP2B*ABO         | T(68.0) | C(32.0) | TT(46.8),TC(42.6),CC(10.7) | 53.9                   | 182.6               |
| <i>rs529565</i>       | 9(136149500)   | ABO(intron)       | C(59.4) | T(40.6) | CC(35.2),CT(48.4),TT(16.4) | 50.0                   | 3.0×10 <sup>3</sup> |
| <i>rs657152</i>       | 9(136139265)   | ABO(intron)       | A(61.0) | C(39.0) | AA(37.1),AC(47.8),CC(15.1) | 37.8                   | 6.5×10 <sup>3</sup> |
| <i>rs630014</i>       | 9(136149722)   | ABO(intron)       | A(62.2) | G(37.8) | AA(37.9),AG(48.6),GG(13.5) | 31.8                   | 0.1                 |
| <i>rs8176702</i>      | 9(136136146)   | ABO(intron)       | A(66.8) | G(33.2) | AA(44.7),AG(44.2),GG(11.1) | 31.1                   | 0.1                 |
| <i>rs2073828</i>      | 9(136137140)   | ABO(intron)       | A(66.4) | G(33.6) | AA(44.0),AG(45.0),GG(11.0) | 30.8                   | 0.1                 |
| <i>rs7857390</i>      | 9(136128546)   | ABO(3'-UTR)       | A(66.4) | G(33.6) | AA(44.0),AG(45.0),GG(11.0) | 30.7                   | 0.1                 |
| <i>rs4962040</i>      | 9(136133531)   | ABO(intron)       | G(66.9) | A(33.1) | GG(44.3),GA(45.2),AA(10.5) | 30.3                   | 0.1                 |
| <i>rs635634</i>       | 9(136155000)   | ABO*SURF6         | T(77.9) | C(22.1) | TT(61.4),TC(32.9),CC(5.7)  | 30.1                   | 1.1×10 <sup>4</sup> |
| <i>rs495828</i>       | 9(136154867)   | ABO*SURF6         | T(77.9) | G(22.1) | TT(61.4),TG(32.9),GG(5.7)  | 30.0                   | 1.1×10 <sup>4</sup> |
| <i>rs505922</i>       | 9(136149229)   | ABO(intron)       | C(59.3) | T(40.7) | CC(35.0),CT(48.7),TT(16.4) | 29.3                   | 1.8×10 <sup>4</sup> |
| <i>rs612169</i>       | 9(136143442)   | ABO(intron)       | G(59.2) | A(40.8) | GG(34.9),GA(48.8),AA(16.4) | 29.3                   | 1.8×10 <sup>4</sup> |
| <i>rs643434</i>       | 9(136142355)   | ABO(intron)       | A(59.2) | G(40.8) | AA(34.9),AG(48.8),GG(16.4) | 29.3                   | 1.8×10 <sup>4</sup> |
| <i>rs8176681</i>      | 9(136139754)   | ABO(intron)       | C(66.3) | T(33.7) | CC(43.8),CT(44.8),TT(11.4) | 29.2                   | 0.2                 |
| <i>rs507666</i>       | 9(136149399)   | ABO(intron)       | A(77.8) | G(22.2) | AA(61.0),AG(33.6),GG(5.4)  | 22.9                   | 4.8×10 <sup>4</sup> |
| <i>rs7025162</i>      | 9(136166346)   | ABO*SURF6         | T(60.2) | C(39.8) | TT(35.4),TC(49.8),CC(14.8) | 22.7                   | 4.3                 |
| <i>rs8176720</i>      | 9(136132873)   | ABO(exon, silent) | C(56.1) | T(43.9) | CC(30.4),CT(51.5),TT(18.1) | 21.5                   | 0.2                 |
| <i>rs7864821</i>      | 9(136086916)   | OBP2B(intron)     | C(60.6) | T(39.4) | CC(36.8),CT(47.7),TT(15.5) | 21.0                   | 3.7                 |
| <i>rs8176740</i>      | 9(136131472)   | ABO(exon, F216I)  | T(74.3) | A(25.7) | TT(54.6),TA(39.5),AA(5.9)  | 19.9                   | 0.2                 |
| <i>rs688976</i>       | 9(136136770)   | ABO(exon, V36F)   | A(74.1) | C(25.9) | AA(54.3),AC(39.5),CC(6.2)  | 19.6                   | 0.2                 |

|                      |              |                   |          |         |                            |      |                   |
|----------------------|--------------|-------------------|----------|---------|----------------------------|------|-------------------|
| <i>rs638756</i>      | 9(136134472) | ABO(intron)       | C(73.6)  | A(26.4) | CC(53.5),CA(40.2),AA(6.3)  | 19.4 | 0.2               |
| <i>rs8176719</i>     | 9(136132908) | ABO(exon, insert) | TC(59.4) | T(40.6) | II(35.0),ID(48.6),DD(16.3) | 19.1 | $2.4 \times 10^7$ |
| <i>rs579459</i>      | 9(136154168) | ABO*SURF6         | C(77.6)  | T(22.4) | CC(60.8),CT(33.7),TT(5.5)  | 18.8 | $9.4 \times 10^4$ |
| <i>rs1752337</i>     | 9(136160228) | ABO*SURF6         | G(72.3)  | T(27.7) | GG(52.2),GT(40.2),TT(7.6)  | 17.9 | 0.3               |
| <i>mf09136175051</i> | 9(136175051) | ABO*SURF6         | T(72.4)  | C(27.6) | TT(52.2),TC(40.4),CC(7.4)  | 17.7 | 0.3               |
| <i>rs651007</i>      | 9(136153875) | ABO*SURF6         | T(77.4)  | C(22.6) | TT(60.7),TC(33.5),CC(5.8)  | 17.7 | $1.2 \times 10^5$ |
| <i>rs687289</i>      | 9(136137106) | ABO(intron)       | A(59.5)  | G(40.5) | AA(35.4),AG(48.2),GG(16.4) | 17.6 | $1.1 \times 10^5$ |
| <i>rs3118662</i>     | 9(136278870) | REXO4(intron)     | G(51.6)  | A(48.4) | GG(26.3),GA(50.7),AA(23)   | 16.7 | 0.3               |
| <i>rs2039184</i>     | 9(136047393) | RALGDS*OBP2B      | G(59.2)  | A(40.8) | GG(35.3),GA(48.0),AA(16.8) | 14.4 | 2.7               |
| <i>rs8176746</i>     | 9(136131322) | ABO(exon, L266M)  | T(82.4)  | G(17.6) | TT(67.3),TG(30.3),GG(2.4)  | 12.9 | $9.7 \times 10^5$ |
| <i>rs9411396</i>     | 9(136187652) | ABO*SURF6         | G(73.7)  | T(26.3) | GG(53.8),GT(39.8),TT(6.4)  | 12.2 | 0.4               |
| <i>rs7030248</i>     | 9(136155359) | ABO*SURF6         | A(71.9)  | G(28.1) | AA(51.0),AG(41.8),GG(7.2)  | 9.0  | 0.3               |
| <i>rs554710</i>      | 9(136181848) | ABO*SURF6         | C(83.3)  | T(16.7) | CC(69.5),CT(27.6),TT(2.9)  | 7.6  | 0.4               |

---

**Table S8. Summary of GWAS on the quaternary trait of B vs. O blood types**

| SNP                   | Chr.(position) | genomic region    | ra(%)    | ma(%)   | allele zygosity (%)        | -log <sub>10</sub> (P) | OR                  |
|-----------------------|----------------|-------------------|----------|---------|----------------------------|------------------------|---------------------|
| <b><u>B vs. O</u></b> |                |                   |          |         |                            |                        |                     |
| <i>rs529565</i>       | 9(136149500)   | ABO(intron)       | C(59.4)  | T(40.6) | CC(35.2),CT(48.4),TT(16.4) | 45.7                   | 1.8×10 <sup>3</sup> |
| <i>rs9919007</i>      | 9(136119527)   | OBP2B*ABO         | T(68.0)  | C(32.0) | TT(46.8),TC(42.6),CC(10.7) | 31.5                   | 41.1                |
| <i>rs657152</i>       | 9(136139265)   | ABO(intron)       | A(61.0)  | C(39.0) | AA(37.1),AC(47.8),CC(15.1) | 31.1                   | 2.2×10 <sup>3</sup> |
| <i>rs7030248</i>      | 9(136155359)   | ABO*SURF6         | A(71.9)  | G(28.1) | AA(51.0),AG(41.8),GG(7.2)  | 31.0                   | 17.3                |
| <i>rs630014</i>       | 9(136149722)   | ABO(intron)       | A(62.2)  | G(37.8) | AA(37.9),AG(48.6),GG(13.5) | 27.9                   | 0.1                 |
| <i>rs505922</i>       | 9(136149229)   | ABO(intron)       | C(59.3)  | T(40.7) | CC(34.9),CT(48.8),TT(16.4) | 26.1                   | 8.9×10 <sup>3</sup> |
| <i>rs612169</i>       | 9(136143442)   | ABO(intron)       | G(59.2)  | A(40.8) | GG(34.9),GA(48.8),AA(16.4) | 26.1                   | 8.9×10 <sup>3</sup> |
| <i>rs643434</i>       | 9(136142355)   | ABO(intron)       | A(59.2)  | G(40.8) | AA(34.9),AG(48.8),GG(16.4) | 26.1                   | 8.9×10 <sup>3</sup> |
| <i>rs8176720</i>      | 9(136132873)   | ABO(exon, silent) | C(56.1)  | T(43.9) | CC(30.4),CT(51.5),TT(18.1) | 23.7                   | 6.2                 |
| <i>rs7857390</i>      | 9(136128546)   | ABO(3'-UTR)       | A(66.4)  | G(33.6) | AA(43.8),AG(45),GG(11.1)   | 23.5                   | 0.2                 |
| <i>rs8176702</i>      | 9(136136146)   | ABO(intron)       | A(66.8)  | G(33.2) | AA(44.7),AG(44.2),GG(11.1) | 22.2                   | 0.2                 |
| <i>rs2073828</i>      | 9(136137140)   | ABO(intron)       | A(66.4)  | G(33.6) | AA(44.0),AG(45.0),GG(11.0) | 21.6                   | 0.2                 |
| <i>rs3118662</i>      | 9(136278870)   | REXO4(intron)     | G(51.6)  | A(48.4) | GG(26.3),GA(50.7),AA(23)   | 21.4                   | 0.2                 |
| <i>rs4962040</i>      | 9(136133531)   | ABO(intron)       | G(66.9)  | A(33.1) | GG(44.3),GA(45.2),AA(10.5) | 21.2                   | 0.2                 |
| <i>rs8176740</i>      | 9(136131472)   | ABO(exon, F216I)  | T(74.3)  | A(25.7) | TT(54.6),TA(39.5),AA(5.9)  | 18.0                   | 0.2                 |
| <i>rs8176719</i>      | 9(136132908)   | ABO(exon, insert) | TC(59.4) | T(40.6) | II(35.1),ID(48.6),DD(16.3) | 17.9                   | 1.3×10 <sup>7</sup> |
| <i>rs688976</i>       | 9(136136770)   | ABO(exon, V36F)   | A(74.0)  | C(25.9) | AA(54.3),AC(39.5),CC(6.2)  | 17.6                   | 0.2                 |
| <i>rs638756</i>       | 9(136134472)   | ABO(intron)       | C(73.6)  | A(26.4) | CC(53.5),CA(40.2),AA(6.3)  | 17.0                   | 0.2                 |
| <i>rs1752337</i>      | 9(136160228)   | ABO*SURF6         | G(72.3)  | T(27.7) | GG(52.2),GT(40.2),TT(7.6)  | 16.8                   | 0.3                 |
| <i>mf09136175051</i>  | 9(136175051)   | ABO*SURF6         | T(72.4)  | C(27.6) | TT(52.2),TC(40.4),CC(7.4)  | 16.7                   | 0.3                 |



|                   |              |                  |         |         |                            |      |                      |
|-------------------|--------------|------------------|---------|---------|----------------------------|------|----------------------|
| <i>rs687289</i>   | 9(136137106) | ABO(intron)      | A(59.5) | G(40.5) | AA(35.4),AG(48.2),GG(16.4) | 15.9 | 6.0×10 <sup>4</sup>  |
| <i>rs8176681</i>  | 9(136139754) | ABO(intron)      | C(66.3) | T(33.7) | CC(43.8),CT(44.8),TT(11.4) | 15.3 | 0.3                  |
| <i>rs9411396</i>  | 9(136187652) | ABO*SURF6        | G(73.7) | T(26.3) | GG(53.8),GT(39.8),TT(6.4)  | 14.8 | 0.3                  |
| <i>rs493014</i>   | 9(136187163) | ABO*SURF6        | G(90.7) | T(9.3)  | GG(81.9),GT(17.5),TT(0.6)  | 14.2 | 7.8                  |
| <i>rs597411</i>   | 9(136192624) | ABO*SURF6        | T(90.5) | G(9.5)  | TT(81.7),TG(17.7),GG(0.6)  | 13.7 | 6.9                  |
| <i>rs7853989</i>  | 9(136131592) | ABO(exon, R176G) | C(82.6) | G(17.4) | CC(66.4),CG(32.4),GG(1.2)  | 10.3 | 3.9×10 <sup>11</sup> |
| <i>rs77843399</i> | 9(136076392) | RALGDS*OBP2B     | T(95.8) | C(4.2)  | TT(91.7),TC(8.2),CC(0.1)   | 9.3  | 12.3                 |

---

**Table S9. Summary of GWAS on the quaternary trait of AB vs. O blood types**

| SNP                    | Chr.(position) | genomic region    | ra(%)    | ma(%)   | allele zygosity (%)        | -log <sub>10</sub> (P) | OR                    |
|------------------------|----------------|-------------------|----------|---------|----------------------------|------------------------|-----------------------|
| <b><u>AB vs. O</u></b> |                |                   |          |         |                            |                        |                       |
| <i>rs8176719</i>       | 9(136132908)   | ABO(exon, insert) | TC(59.4) | T(40.6) | II(35.1),ID(48.6),DD(16.3) | 57.7                   | 1.4×10 <sup>14</sup>  |
| <i>rs657152</i>        | 9(136139265)   | ABO(intron)       | A(61.0)  | C(39.0) | AA(37.1),AC(47.8),CC(15.1) | 55.4                   | 2.2×10 <sup>5</sup>   |
| <i>rs9919007</i>       | 9(136119527)   | OBP2B*ABO         | T(68.0)  | C(32.0) | TT(46.8),TC(42.6),CC(10.7) | 47.7                   | 3.5×10 <sup>2</sup>   |
| <i>rs529565</i>        | 9(136149500)   | ABO(intron)       | C(59.4)  | T(40.6) | CC(35.2),CT(48.4),TT(16.4) | 45.6                   | 5.3×10 <sup>5</sup>   |
| <i>rs505922</i>        | 9(136149229)   | ABO(intron)       | C(59.3)  | T(40.7) | CC(35.0),CT(48.6),TT(16.4) | 38.9                   | 2.7×10 <sup>6</sup>   |
| <i>rs612169</i>        | 9(136143442)   | ABO(intron)       | G(59.2)  | A(40.8) | GG(34.9),GA(48.8),AA(16.4) | 38.9                   | 2.7×10 <sup>6</sup>   |
| <i>rs643434</i>        | 9(136142355)   | ABO(intron)       | A(59.2)  | G(40.8) | AA(34.9),AG(48.8),GG(16.4) | 38.9                   | 2.7×10 <sup>6</sup>   |
| <i>rs687289</i>        | 9(136137106)   | ABO(intron)       | A(59.5)  | G(40.5) | AA(35.4),AG(48.2),GG(16.4) | 25.0                   | 4.1×10 <sup>7</sup>   |
| <i>rs495828</i>        | 9(136154867)   | ABO*SURF6         | T(77.9)  | G(22.1) | TT(61.5),TG(32.8),GG(5.7)  | 21.2                   | 1.4×10 <sup>3</sup>   |
| <i>rs635634</i>        | 9(136155000)   | ABO*SURF6         | T(77.9)  | C(22.1) | TT(61.4),TC(32.9),CC(5.7)  | 21.2                   | 1.4×10 <sup>3</sup>   |
| <i>rs579459</i>        | 9(136154168)   | ABO*SURF6         | C(77.6)  | T(22.4) | CC(60.8),CT(33.7),TT(5.5)  | 18.9                   | 3.7×10 <sup>3</sup>   |
| <i>rs507666</i>        | 9(136149399)   | ABO(intron)       | A(77.8)  | G(22.2) | AA(61.0),AG(33.6),GG(5.4)  | 18.8                   | 3.2×10 <sup>3</sup>   |
| <i>rs651007</i>        | 9(136153875)   | ABO*SURF6         | T(77.4)  | C(22.6) | TT(60.7),TC(33.5),CC(5.8)  | 18.3                   | 4.0×10 <sup>3</sup>   |
| <i>rs3118662</i>       | 9(136278870)   | REXO4(intron)     | G(51.6)  | A(48.4) | GG(26.3),GA(50.7),AA(23.0) | 17.2                   | 0.1                   |
| <i>rs8176681</i>       | 9(136139754)   | ABO(intron)       | C(66.3)  | T(33.7) | CC(43.8),CT(44.8),TT(11.4) | 16.5                   | 0.03                  |
| <i>rs7857390</i>       | 9(136128546)   | ABO(3'-UTR)       | A(66.4)  | G(33.6) | AA(43.8),AG(45),GG(11.1)   | 13.2                   | 2.0×10 <sup>-12</sup> |
| <i>rs7864821</i>       | 9(136086916)   | OBP2B(intron)     | C(60.6)  | T(39.4) | CC(36.8),CT(47.7),TT(15.5) | 13.2                   | 5.0                   |
| <i>rs493014</i>        | 9(136187163)   | ABO*SURF6         | G(90.7)  | T(9.3)  | GG(81.9),GT(17.5),TT(0.6)  | 11.4                   | 9.6                   |
| <i>rs7030248</i>       | 9(136155359)   | ABO*SURF6         | A(71.9)  | G(28.1) | AA(51.0),AG(41.8),GG(7.2)  | 11.0                   | 6.3                   |
| <i>rs9411396</i>       | 9(136187652)   | ABO*SURF6         | G(73.7)  | T(26.3) | GG(53.8),GT(39.8),TT(6.4)  | 10.8                   | 0.06                  |

|                      |              |                  |         |         |                            |      |                     |
|----------------------|--------------|------------------|---------|---------|----------------------------|------|---------------------|
| <i>mf09136175051</i> | 9(136175051) | ABO*SURF6        | T(72.4) | C(27.6) | TT(52.2),TC(40.4),CC(7.4)  | 10.7 | 0.03                |
| <i>rs1752337</i>     | 9(136160228) | ABO*SURF6        | G(72.3) | T(27.7) | GG(52.2),GT(40.2),TT(7.6)  | 10.7 | 0.03                |
| <i>rs7853989</i>     | 9(136131592) | ABO(exon, R176G) | C(82.6) | G(17.4) | CC(66.4),CG(32.4),GG(1.2)  | 10.7 | 1.2×10 <sup>5</sup> |
| <i>rs597411</i>      | 9(136192624) | ABO*SURF6        | T(90.5) | G(9.5)  | TT(81.7),TG(17.7),GG(0.6)  | 8.9  | 7.0                 |
| <i>rs630014</i>      | 9(136149722) | ABO(intron)      | A(62.2) | G(37.8) | AA(37.9),AG(48.6),GG(13.5) | 8.9  | 0.001               |
| <i>rs2039184</i>     | 9(136047393) | RALGDS*OBP2B     | G(59.2) | A(40.8) | GG(35.4),GA(48.0),AA(16.8) | 8.2  | 3.2                 |
| <i>rs4962040</i>     | 9(136133531) | ABO(intron)      | G(66.9) | A(33.1) | GG(44.3),GA(45.2),AA(10.5) | 7.8  | 0.003               |
| <i>rs8176702</i>     | 9(136136146) | ABO(intron)      | A(66.8) | G(33.2) | AA(44.7),AG(44.2),GG(11.1) | 7.8  | 0.003               |
| <i>rs2073828</i>     | 9(136137140) | ABO(intron)      | A(66.4) | G(33.6) | AA(44.0),AG(45.0),GG(11.0) | 7.7  | 0.003               |

---
